# Supplementary material for: Profiling analysis of circular RNA and mRNA in human temporal lobe epilepsy with hippocampal sclerosis ILAE type 1
Source: Research Square preprint supplement (doi:10.21203/rs.3.rs-331427/v1), 2021-03-22
Supplement: Supplementary file 1 [file 0e7548caee54702b2561cf81.docx]

Table S1 Clinical data of HS ILAE type 1 and no-HS patients

| Sample | Age at surgery(years) | Gender | First year of age(years) | AEDs | ILAE classification | RNA-Seq |
| --- | --- | --- | --- | --- | --- | --- |
| I1 | 24 | M | 9 | PHB LEV VPA | I | Y |
| I2 | 29 | M | 9 | CBZ LTG | I | Y |
| I3 | 29 | F | 4 | VPA LEV TPM | I | Y |
| I4 | 7 | F | 4 | LEV CBZ LTG | I | N |
| I5 | 9 | M | 1 | LEV CBZ LTG | I | N |
| I6 | 24 | F | 4 | LEV LTG | 1 | N |
| I7 | 14 | M | 5 | CBZ LTG | 1 | N |
| C1 | 27 | M | 22 | PHB LEV VPA | No-HS | Y |
| C2 | 31 | M | 29 | OXC VPA TPM | No-HS | Y |
| C3 | 30 | F | 27 | PHB LEV VPA | No-HS | Y |
| C4 | 46 | M | 36 | PHB LEV | No-HS | N |
| C5 | 26 | F | 18 | CBZ TPM | No-HS | N |
| C6 | 26 | F | 11 | CBZ VPA | No-HS | N |
| C7 | 51 | F | 27 | OXC VPA TPM | No-HS | N |

Table S2 Primer sequences of the quantitative real-time reverse transcription polymerase chain reaction (RT-qPCR) for validation of circRNA and related mRNA.

|  | Primers | Primer Sequences |
| --- | --- | --- |
| 1 | FYN-F | TGGAGGTGTGAACTCTTCGTC |
| FYN-R | TCTGTCCGTGCTTCATAGTCA |
| 2 | SELENBP1-F | ACCCAGGGAAGAGATCGTCTA |
| SELENBP1-R | ACTTGGGGTCAACATCCACAG |
| 3 | GRIPAP1-F | GGACAAACAACTACCAGCTTTCA |
| GRIPAP1-R | GCGACCTTCTGTCGAAGACT |
| 4 | hsa_circ_0025349-F | GCGAACATGCTTCCGAAGAT |
| hsa_circ_0025349-R | TGACCAGCCTCAACTCCAAA |
| 5 | hsa_circ_0002405-F | ACTCCTGTACCAGTCCTACAA |
| hsa_circ_0002405-R | GACGATTGAGGTCCTTTGGA |
| 6 | hsa_circ_0004805-F | AGAGACTGCTTTTGAGTGACA |
| hsa_circ_0004805-R | TGCAGAAAAGCCTTCCACTG |
| 7 | hsa_circ_0032254-F | GAAATCATCAATTACCGAGATTCC |
| hsa_circ_0032254-R | GAAGGAGTAGTGCTGAGGGAGG |
| 8 | hsa_circ_0032875-F | CAGCGACTCTGAGGAGGAACA |
| hsa_circ_0032875-R | CCTGCCTCTTTTCCACAGAAAC |
| 9 | GAPDH-F | GGAGCGAGATCCCTCCAAAAT |
| GAPDH-R | GGCTGTTGTCATACTTCTCATGG |


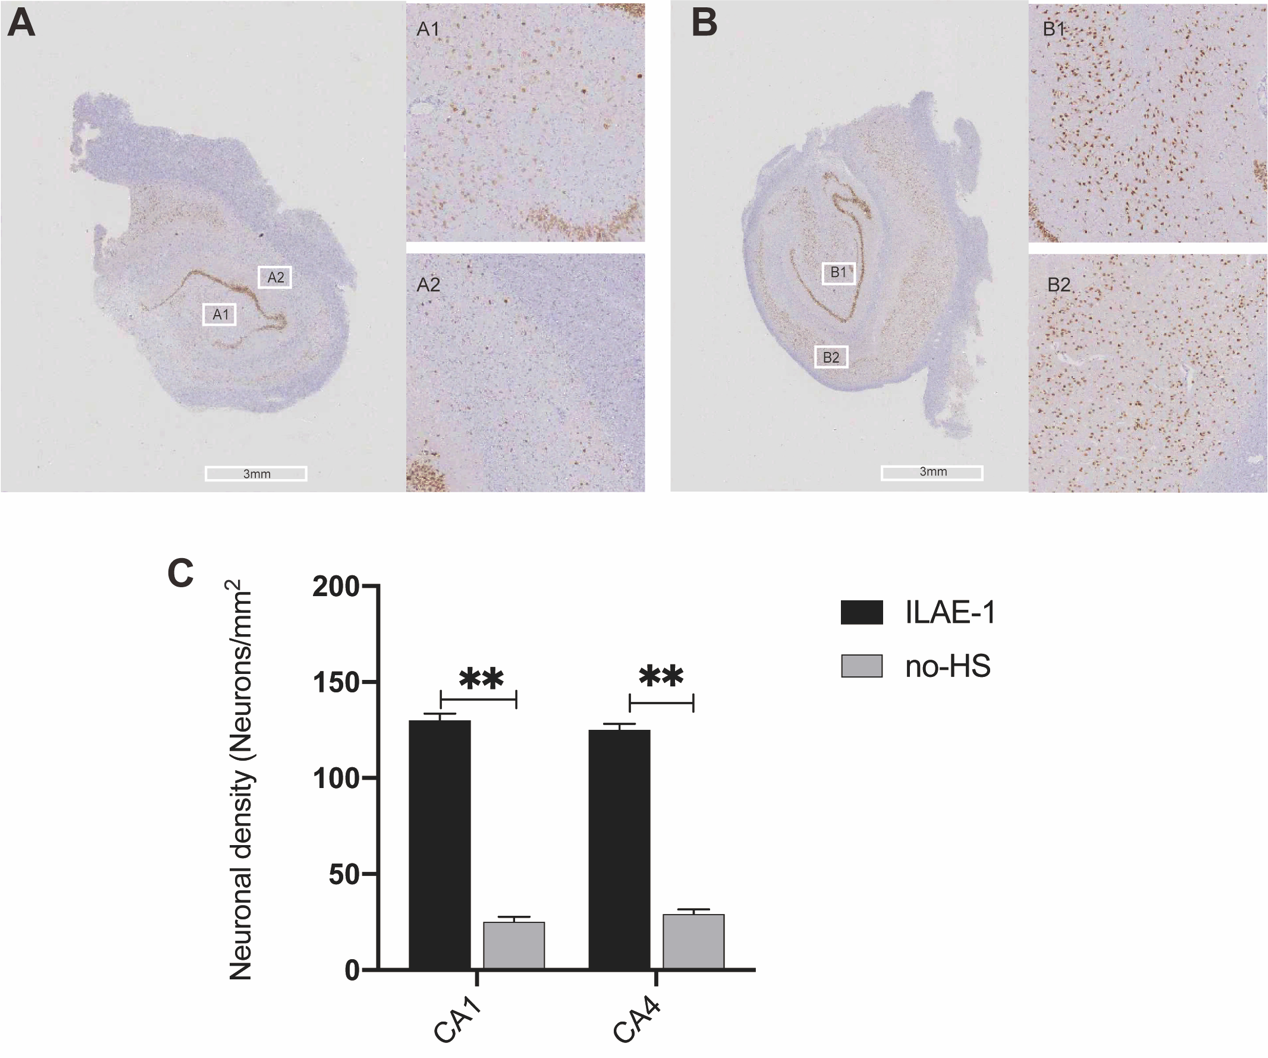


Fig. S1 Immunohistochemical NeuN staining of ILAE-1 and no-HS group. A. Low-magnification view of the ILAE-1 group showing neuronal loss in the CA4 and CA1 regions; High-magnification view of the ILAE-1 group in CA4 (A1) and CA1 (A2) ; B. Low-magnification view of the no-HS group showing no neuronal loss in the CA4 and CA1 ; High-magnification view of the no-HS group in CA4 (B1) and CA1 (B2). Scale bars = 3 mm (A、B) and 200 µm (A1, A2, B1, B2). C. Comparison of neuronal density between the HS ILAE type 1 and No-HS groups

Fig. S2 Use of ClueGO/CluePedia to analyse the interaction networks of enriched biologic processes. Multiple color dots indicate that it revolves around multiple biologic processes. The GO term/pathway network connectivity defined by edges and functional clusters on genes shared between terms (kappa score ≥ 0.4) and displaying pathways only with p≤ 0.05.
